# Supplementary material
Source: PubMed Central journal article supplement (PMC3310341)
Supplement: NIHMS330919-supplement-supp_Table_S1-S6___Fig_S1-S16.pdf [file NIHMS330919-supplement-supp_Table_S1-S6___Fig_S1-S16.pdf]

# **BiHelix: Towards *de novo* Structure Prediction of an Ensemble of G-Protein Coupled Receptor Conformations**

Ravinder Abrol<sup>1,\*</sup>, Jenelle K. Bray<sup>2</sup>, and William A. Goddard III<sup>1,\*</sup>

<sup>1</sup>Materials and Process Simulation Center (MC 139-74), California Institute of Technology, Pasadena, CA 91125

<sup>2</sup>Simbios, NIH Center for Biomedical Computation, Stanford University, Stanford, CA 94305

Supplementary Information

| GPCR2-GPCR1     | TMH  | $\Delta x$ | $\Delta y$ | $\Delta h$ | $\Delta \theta$ | $\Delta \varphi$ | $\Delta \eta$ |
|-----------------|------|------------|------------|------------|-----------------|------------------|---------------|
| Opsin-Rhodopsin | TMH1 | 0.4        | 0.3        | -0.7       | -3              | 6                | -5            |
|                 | TMH2 | -0.1       | 0          | 0.7        | 1               | 5                | 7             |
|                 | TMH3 | 0          | 0          | 0.1        | 1               | 14               | -28           |
|                 | TMH4 | -2.1       | -1.4       | 0.3        | 0               | 6                | -16           |
|                 | TMH5 | 1.1        | -3.6       | -0.7       | 1               | 26               | -6            |
|                 | TMH6 | -0.4       | -3.7       | 0.3        | -3              | -43              | -31           |
|                 | TMH7 | 0          | -0.8       | -0.2       | -4              | 10               | -2            |

**Table S1:** Helix orientation differences between Bovine Opsin and Rhodopsin with biggest changes in rotation angle  $\eta$  highlighted.

| SCHRnk | SCH-Energy | SBHRnk | SBH-Energy | Eta1 | Eta2 | Eta3 | Eta4 | Eta5 | Eta6 | Eta7 | CRmsd |
|--------|------------|--------|------------|------|------|------|------|------|------|------|-------|
| 1      | 241        | 1      | 236        | 0    | 0    | 0    | 0    | 0    | 0    | 0    | 0.3   |
| 2      | 261        | 2      | 251        | 0    | 0    | 0    | 0    | 0    | 60   | 0    | 1.3   |
| 3      | 278        | 131    | 321        | 0    | 0    | 0    | 0    | 0    | 0    | 300  | 0.8   |
| 4      | 291        | 22     | 288        | 0    | 0    | 0    | 0    | 0    | 120  | 0    | 2.2   |
| 5      | 292        | 70     | 307        | 0    | 0    | 0    | 30   | 0    | 0    | 0    | 0.5   |
| 6      | 300        | 57     | 303        | 0    | 0    | 0    | 0    | 90   | 60   | 0    | 1.8   |
| 7      | 307        | 93     | 313        | 0    | 0    | 0    | 0    | 0    | 120  | 30   | 2.2   |
| 8      | 307        | 128    | 320        | 330  | 0    | 0    | 0    | 0    | 0    | 300  | 0.9   |
| 9      | 309        | 4      | 261        | 0    | 0    | 0    | 0    | 90   | 0    | 0    | 1.3   |
| 10     | 311        | 8      | 275        | 0    | 0    | 0    | 0    | 0    | 150  | 0    | 2.5   |
| 11     | 312        | 13     | 284        | 0    | 0    | 0    | 0    | 0    | 0    | 270  | 1.1   |
| 12     | 312        | 15     | 284        | 0    | 0    | 0    | 0    | 0    | 0    | 60   | 0.8   |
| 13     | 312        | 146    | 323        | 0    | 0    | 0    | 0    | 0    | 150  | 60   | 2.6   |
| 14     | 313        | 16     | 284        | 0    | 0    | 0    | 330  | 0    | 0    | 0    | 0.5   |
| 15     | 315        | 38     | 297        | 0    | 0    | 0    | 0    | 0    | 0    | 330  | 0.5   |
| 16     | 318        | 3      | 260        | 0    | 0    | 0    | 0    | 180  | 0    | 0    | 1.8   |
| 17     | 322        | 45     | 300        | 330  | 0    | 0    | 0    | 0    | 0    | 0    | 0.6   |
| 18     | 326        | 240    | 334        | 0    | 0    | 0    | 0    | 0    | 30   | 60   | 1.1   |
| 19     | 327        | 44     | 299        | 0    | 0    | 0    | 330  | 0    | 60   | 0    | 1.4   |
| 20     | 329        | 254    | 335        | 0    | 0    | 0    | 0    | 0    | 120  | 60   | 2.3   |

**Table S2:** Top 20 bovine Opsin conformations after BiHelix/CombiHelix. Conformation observed in the receptor's crystal structure shown in green cells.

| SCHRnk | SCH-Energy | SBHRnk | SBH-Energy | Eta1 | Eta2 | Eta3 | Eta4 | Eta5 | Eta6 | Eta7 | CRmsd |
|--------|------------|--------|------------|------|------|------|------|------|------|------|-------|
| 1      | -21        | 4      | -5         | 0    | 0    | 0    | 0    | 0    | 0    | 0    | 0.0   |
| 2      | 5          | 21     | 32         | 0    | 0    | 0    | 30   | 0    | 0    | 0    | 0.5   |
| 3      | 22         | 1      | -39        | 0    | 0    | 0    | 120  | 0    | 0    | 0    | 1.4   |
| 4      | 29         | 7      | 3          | 0    | 0    | 0    | 330  | 0    | 0    | 0    | 0.5   |
| 5      | 39         | 45     | 47         | 120  | 0    | 0    | 0    | 0    | 0    | 0    | 1.6   |
| 6      | 42         | 12     | 20         | 0    | 0    | 0    | 60   | 0    | 0    | 0    | 0.8   |
| 7      | 50         | 96     | 62         | 0    | 0    | 0    | 0    | 270  | 0    | 0    | 1.4   |
| 8      | 51         | 23     | 33         | 90   | 0    | 0    | 0    | 0    | 0    | 0    | 1.3   |
| 9      | 62         | 30     | 41         | 90   | 0    | 0    | 330  | 0    | 0    | 0    | 1.3   |
| 10     | 64         | 67     | 53         | 0    | 0    | 0    | 0    | 0    | 0    | 90   | 1.3   |
| 11     | 66         | 2      | -9         | 0    | 0    | 0    | 90   | 0    | 0    | 0    | 1.2   |
| 12     | 79         | 3      | -8         | 0    | 0    | 0    | 150  | 0    | 0    | 0    | 1.6   |
| 13     | 81         | 181    | 76         | 270  | 0    | 0    | 0    | 0    | 0    | 0    | 1.3   |
| 14     | 87         | 127    | 69         | 210  | 0    | 0    | 0    | 0    | 0    | 0    | 1.7   |
| 15     | 91         | 39     | 44         | 0    | 0    | 0    | 300  | 0    | 0    | 0    | 0.8   |
| 16     | 92         | 113    | 66         | 0    | 0    | 0    | 330  | 270  | 0    | 0    | 1.4   |
| 17     | 93         | 72     | 55         | 120  | 0    | 0    | 330  | 0    | 0    | 0    | 1.6   |
| 18     | 95         | 1438   | 124        | 0    | 0    | 0    | 0    | 0    | 30   | 0    | 0.6   |
| 19     | 96         | 128    | 69         | 90   | 0    | 0    | 30   | 0    | 0    | 0    | 1.3   |
| 20     | 97         | 339    | 89         | 330  | 0    | 0    | 0    | 0    | 0    | 0    | 0.5   |

**Table S3:** Top 20 human Beta2 adrenergic receptor conformations after BiHelix/CombiHelix. Conformation observed in the receptor's crystal structure shown in green cells.

| SCHRnk | SCH-Energy | SBHRnk | SBH-Energy | Eta1 | Eta2 | Eta3 | Eta4 | Eta5 | Eta6 | Eta7 | CRmsd |
|--------|------------|--------|------------|------|------|------|------|------|------|------|-------|
| 1      | -359       | 2      | -390       | 0    | 0    | 0    | 0    | 0    | 0    | 0    | 0.0   |
| 2      | -341       | 5      | -374       | 0    | 0    | 0    | 330  | 0    | 0    | 0    | 0.5   |
| 3      | -318       | 22     | -340       | 90   | 0    | 0    | 0    | 0    | 0    | 0    | 1.3   |
| 4      | -316       | 82     | -310       | 240  | 0    | 0    | 0    | 0    | 0    | 0    | 1.6   |
| 5      | -310       | 48     | -324       | 0    | 0    | 0    | 0    | 0    | 90   | 0    | 1.7   |
| 6      | -309       | 54     | -320       | 0    | 0    | 0    | 0    | 300  | 0    | 0    | 1.0   |
| 7      | -299       | 12     | -355       | 0    | 0    | 0    | 150  | 0    | 0    | 0    | 1.6   |
| 8      | -299       | 57     | -318       | 150  | 0    | 0    | 0    | 0    | 0    | 0    | 1.7   |
| 9      | -298       | 24     | -337       | 0    | 0    | 0    | 0    | 330  | 0    | 0    | 0.6   |
| 10     | -298       | 47     | -324       | 90   | 0    | 0    | 330  | 0    | 0    | 0    | 1.3   |
| 11     | -298       | 26     | -336       | 0    | 0    | 0    | 0    | 0    | 0    | 90   | 1.2   |
| 12     | -296       | 88     | -308       | 0    | 0    | 0    | 330  | 0    | 90   | 0    | 1.7   |
| 13     | -293       | 108    | -304       | 0    | 0    | 0    | 0    | 0    | 60   | 0    | 1.2   |
| 14     | -291       | 111    | -303       | 210  | 0    | 0    | 0    | 0    | 0    | 0    | 1.7   |
| 15     | -286       | 128    | -300       | 90   | 0    | 0    | 30   | 0    | 0    | 0    | 1.3   |
| 16     | -284       | 217    | -287       | 0    | 0    | 0    | 0    | 0    | 120  | 0    | 2.0   |
| 17     | -282       | 368    | -274       | 90   | 0    | 0    | 0    | 0    | 90   | 0    | 2.1   |
| 18     | -281       | 16     | -347       | 0    | 0    | 0    | 0    | 0    | 300  | 0    | 1.2   |
| 19     | -280       | 87     | -308       | 0    | 0    | 0    | 150  | 330  | 0    | 0    | 1.7   |
| 20     | -277       | 1949   | -232       | 0    | 0    | 0    | 0    | 0    | 120  | 300  | 2.2   |

**Table S4:** Top 20 turkey Beta1 adrenergic receptor conformations after BiHelix/CombiHelix. Conformation observed in the receptor's crystal structure shown in green cells.

| SCHRnk | SCH-Energy | SBHRnk | SBH-Energy | Eta1 | Eta2 | Eta3 | Eta4 | Eta5 | Eta6 | Eta7 | CRmsd |
|--------|------------|--------|------------|------|------|------|------|------|------|------|-------|
| 1      | 65         | 1      | 111        | 0    | 0    | 0    | 0    | 0    | 0    | 0    | 0.0   |
| 2      | 138        | 3      | 135        | 0    | 0    | 0    | 150  | 0    | 0    | 0    | 1.5   |
| 3      | 153        | 2      | 124        | 0    | 0    | 0    | 330  | 0    | 0    | 0    | 0.5   |
| 4      | 158        | 13     | 158        | 0    | 0    | 0    | 0    | 0    | 120  | 0    | 2.9   |
| 5      | 160        | 9      | 156        | 0    | 0    | 0    | 0    | 30   | 0    | 0    | 0.5   |
| 6      | 163        | 88     | 190        | 330  | 0    | 0    | 0    | 0    | 0    | 0    | 0.5   |
| 7      | 164        | 14     | 158        | 0    | 0    | 0    | 0    | 60   | 0    | 0    | 0.9   |
| 8      | 167        | 16     | 160        | 0    | 0    | 0    | 30   | 0    | 0    | 0    | 0.5   |
| 9      | 174        | 31     | 171        | 0    | 0    | 0    | 0    | 180  | 0    | 0    | 1.8   |
| 10     | 178        | 15     | 159        | 0    | 0    | 0    | 0    | 210  | 0    | 0    | 1.8   |
| 11     | 179        | 184    | 207        | 0    | 0    | 0    | 210  | 0    | 0    | 0    | 1.5   |
| 12     | 183        | 294    | 217        | 30   | 0    | 0    | 0    | 0    | 0    | 0    | 0.5   |
| 13     | 183        | 4      | 146        | 0    | 0    | 0    | 0    | 90   | 0    | 0    | 1.3   |
| 14     | 185        | 17     | 160        | 0    | 0    | 0    | 0    | 330  | 0    | 0    | 0.5   |
| 15     | 185        | 49     | 178        | 0    | 0    | 0    | 0    | 210  | 60   | 0    | 2.4   |
| 16     | 186        | 115    | 196        | 0    | 0    | 0    | 180  | 0    | 0    | 0    | 1.5   |
| 17     | 187        | 57     | 181        | 0    | 0    | 0    | 0    | 120  | 0    | 0    | 1.6   |
| 18     | 188        | 118    | 197        | 0    | 0    | 0    | 0    | 0    | 0    | 90   | 1.4   |
| 19     | 192        | 19     | 162        | 0    | 0    | 0    | 0    | 0    | 30   | 0    | 0.9   |
| 20     | 197        | 32     | 173        | 0    | 0    | 0    | 0    | 150  | 0    | 0    | 1.8   |

**Table S5:** Top 20 human Adenosine A2A conformations after BiHelix/CombiHelix. Conformation observed in the receptor's crystal structure shown in green cells.

| SCHRnk | SCH-Energy | SBHRnk | SBH-Energy | Eta1 | Eta2 | Eta3 | Eta4 | Eta5 | Eta6 | Eta7 | CRmsd |
|--------|------------|--------|------------|------|------|------|------|------|------|------|-------|
| 1      | -50        | 1      | -48        | 0    | 0    | 0    | 0    | 0    | 0    | 0    | 0.3   |
| 2      | -9         | 2      | -29        | 0    | 0    | 0    | 0    | 0    | 60   | 330  | 1.5   |
| 3      | 5          | 27     | 21         | 0    | 0    | 0    | 0    | 0    | 30   | 0    | 0.8   |
| 4      | 24         | 10     | 0          | 0    | 0    | 0    | 0    | 0    | 60   | 300  | 1.7   |
| 5      | 26         | 13     | 5          | 0    | 0    | 0    | 0    | 0    | 30   | 330  | 0.9   |
| 6      | 32         | 3      | -22        | 0    | 0    | 0    | 0    | 0    | 60   | 0    | 1.4   |
| 7      | 34         | 23     | 17         | 0    | 0    | 0    | 0    | 0    | 60   | 30   | 1.5   |
| 8      | 39         | 65     | 46         | 330  | 0    | 0    | 0    | 0    | 60   | 300  | 1.7   |
| 9      | 42         | 20     | 15         | 330  | 0    | 0    | 0    | 0    | 0    | 0    | 0.6   |
| 10     | 43         | 79     | 51         | 0    | 0    | 0    | 0    | 0    | 60   | 120  | 2.1   |
| 11     | 47         | 11     | 4          | 0    | 0    | 0    | 0    | 0    | 120  | 300  | 2.5   |
| 12     | 59         | 22     | 17         | 0    | 0    | 0    | 120  | 0    | 0    | 0    | 1.4   |
| 13     | 64         | 164    | 75         | 0    | 0    | 0    | 0    | 0    | 0    | 330  | 0.6   |
| 14     | 66         | 7      | -7         | 0    | 0    | 0    | 0    | 330  | 0    | 0    | 0.7   |
| 15     | 69         | 56     | 41         | 330  | 0    | 0    | 0    | 0    | 60   | 0    | 1.5   |
| 16     | 76         | 6      | -11        | 0    | 0    | 0    | 0    | 0    | 90   | 0    | 1.9   |
| 17     | 80         | 50     | 39         | 330  | 0    | 0    | 0    | 0    | 60   | 30   | 1.5   |
| 18     | 83         | 4      | -15        | 0    | 0    | 0    | 0    | 0    | 90   | 330  | 2.0   |
| 19     | 83         | 18     | 15         | 0    | 0    | 0    | 0    | 0    | 60   | 90   | 1.9   |
| 20     | 85         | 8      | -6         | 0    | 0    | 0    | 0    | 0    | 90   | 300  | 2.1   |

**Table S6:** Top 20 squid Rhodopsin conformations after BiHelix/CombiHelix. Conformation observed in the receptor's crystal structure shown in green cells.

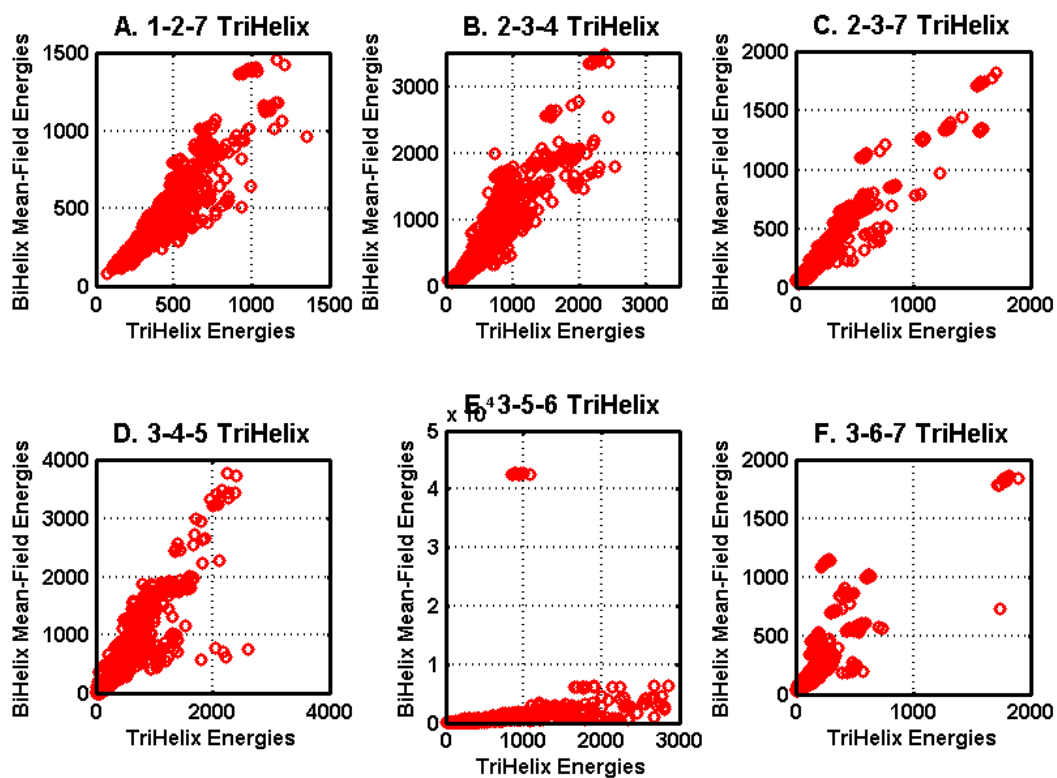

**Figure S1:** Comparison of the BiHelix Mean-Field energies with exact energies for 6 three-helix bundles for h $\beta$ 2-AR. **A.** H1-H2-H7; **B.** H2-H3-H4; **C.** H2-H3-H7; **D.** H3-H4-H5; **E.** H3-H5-H6; **F.** H3-H6-H7.



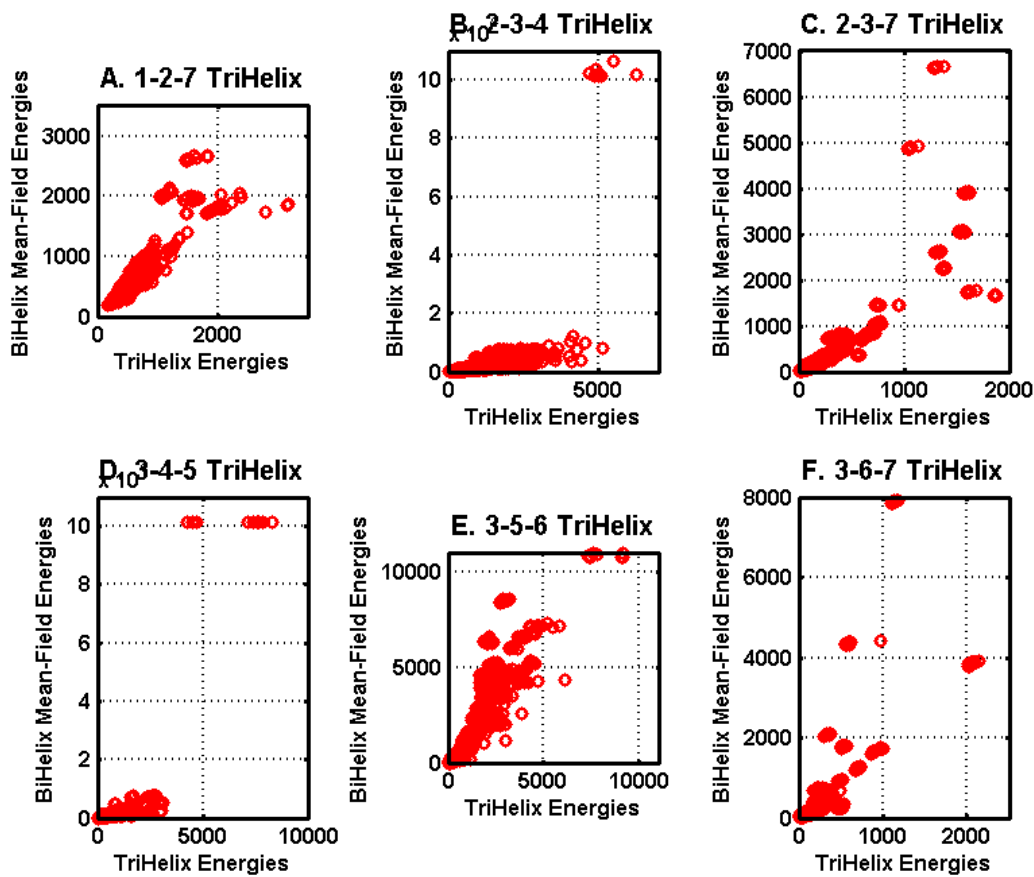

**Figure S2:** Same comparison as in **Figure S1** for hA2AR.

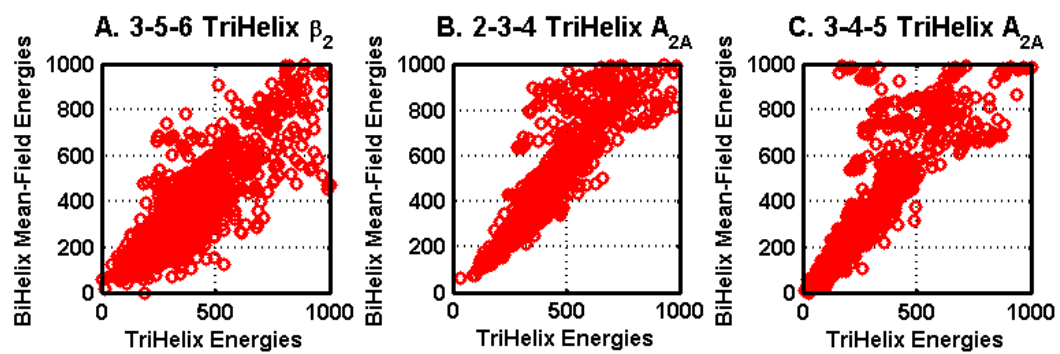

**Figure S3:** Same comparison as in Figures S1 and S2, but focusing on lowest 1000kcal/mol energy range for three cases. **A.** hb2-AR H3-H5-H6; **B.** hA2AR H2-H3-H4; **C.** hA2AR H3-H4-H5.

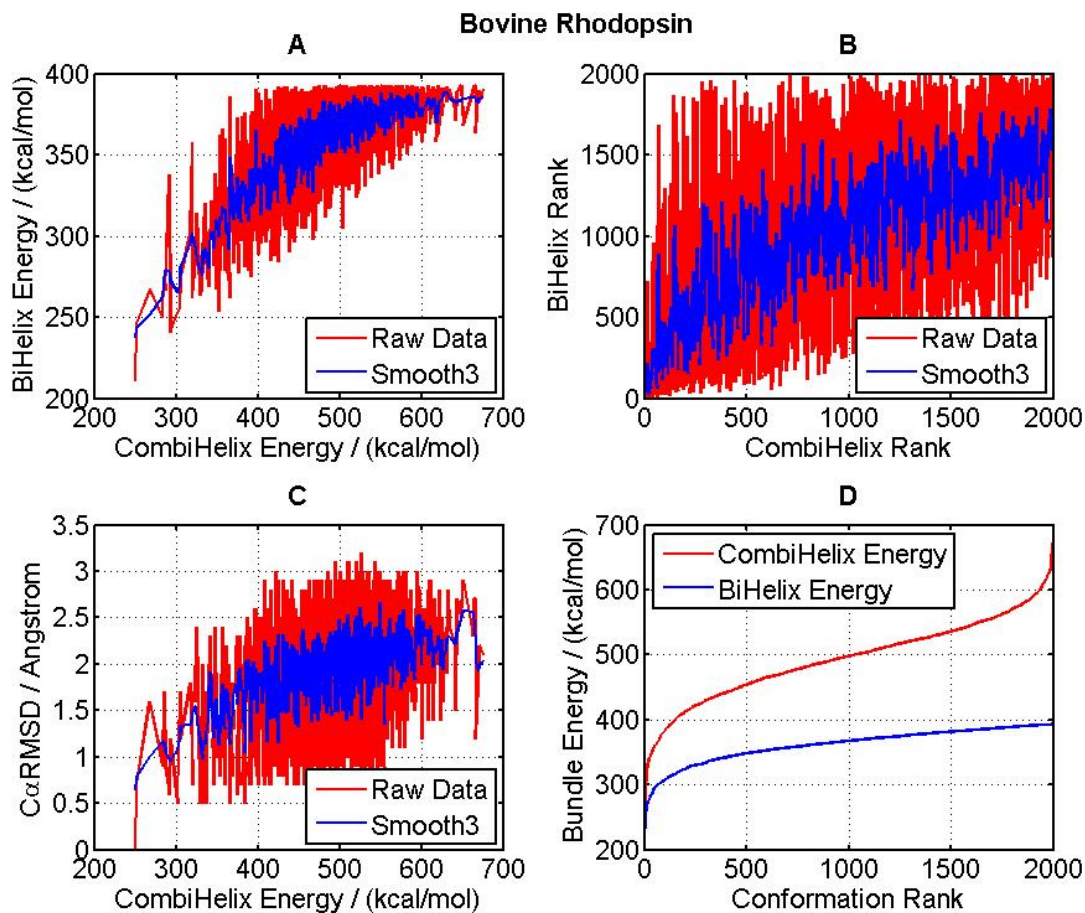

**Figure S4:** Bovine Rhodopsin. **A.** Correlation between CombiHelix energies and BiHelix energies of the predicted helix bundle conformations, raw data (in red) and smoothed data using  $\pm 1$  data points (in blue); **B.** Correlation between CombiHelix Rank and BiHelix Rank of the predicted conformations (colors same as in panel A); **C.** Correlation between CombiHelix energies and the corresponding Ca-RMSD of those conformations relative to the conformation observed in the crystal structure (colors same as in panel A); **D.** BiHelix (Blue) and CombiHelix (Red) energies as a function of Conformation Rank.

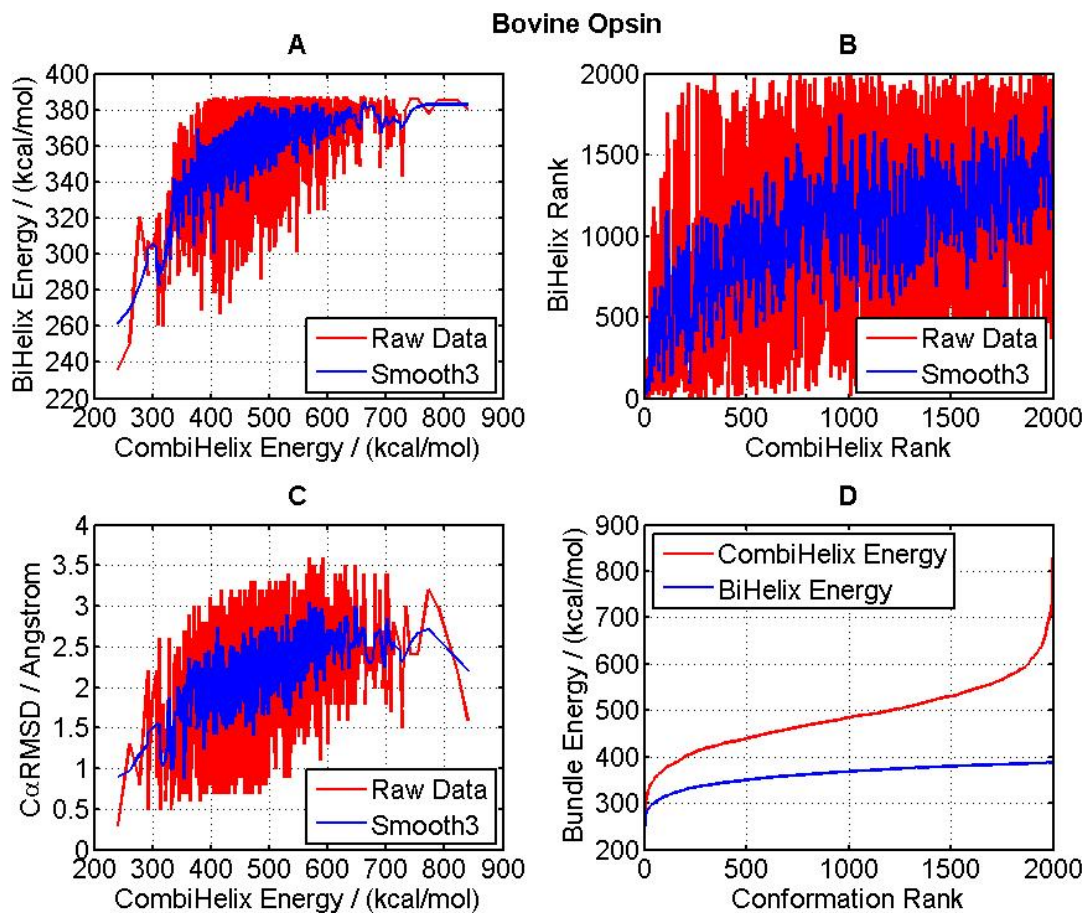

**Figure S5:** Same as **Figure S4** for Bovine Opsin.

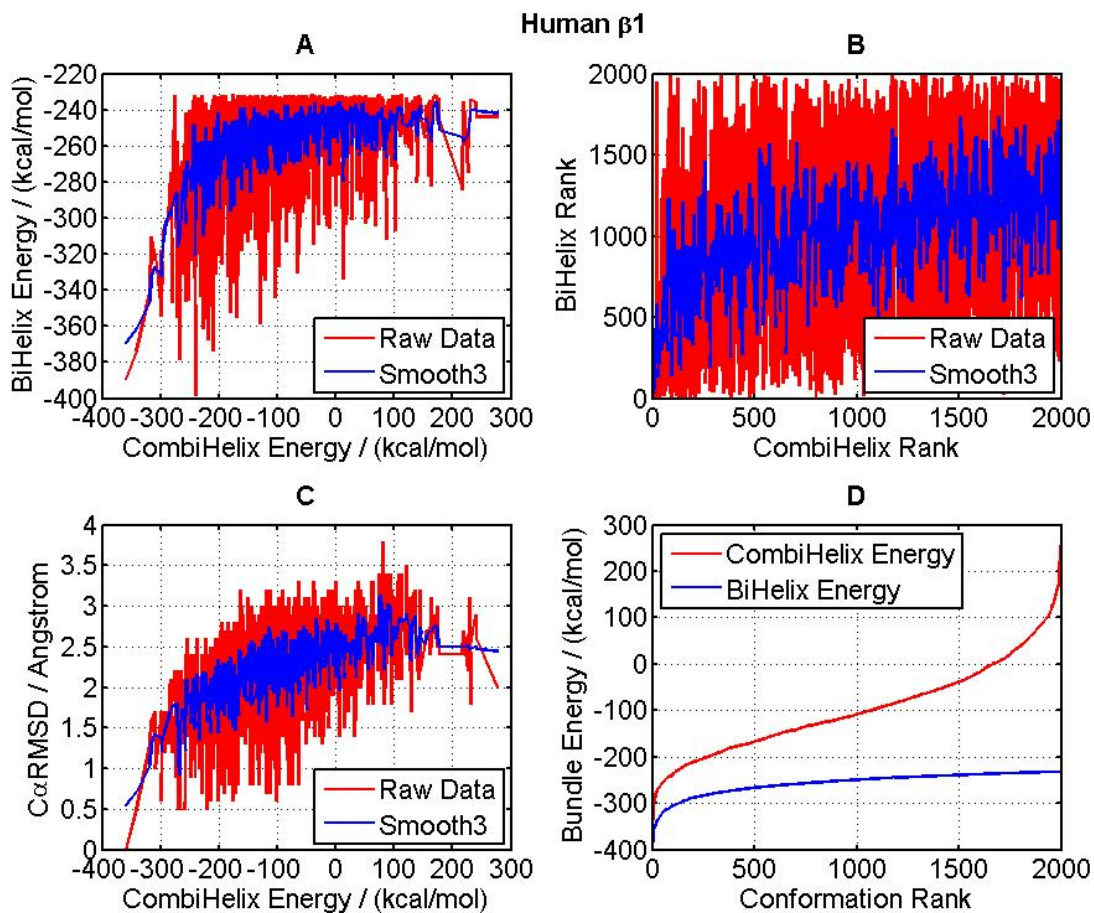

**Figure S6:** Same as **Figure S4** for human Beta1 adrenergic receptor.

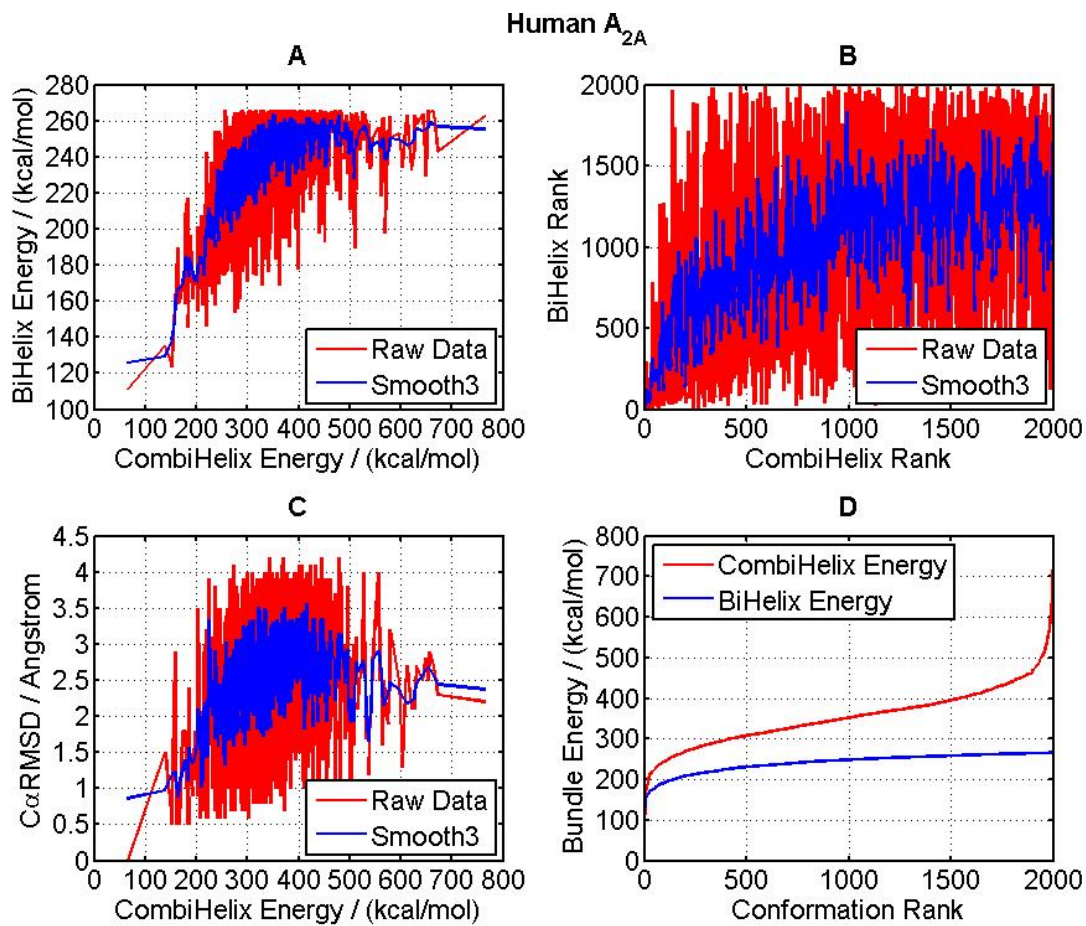

**Figure S7:** Same as **Figure S4** for human A<sub>2A</sub> adenosine receptor.

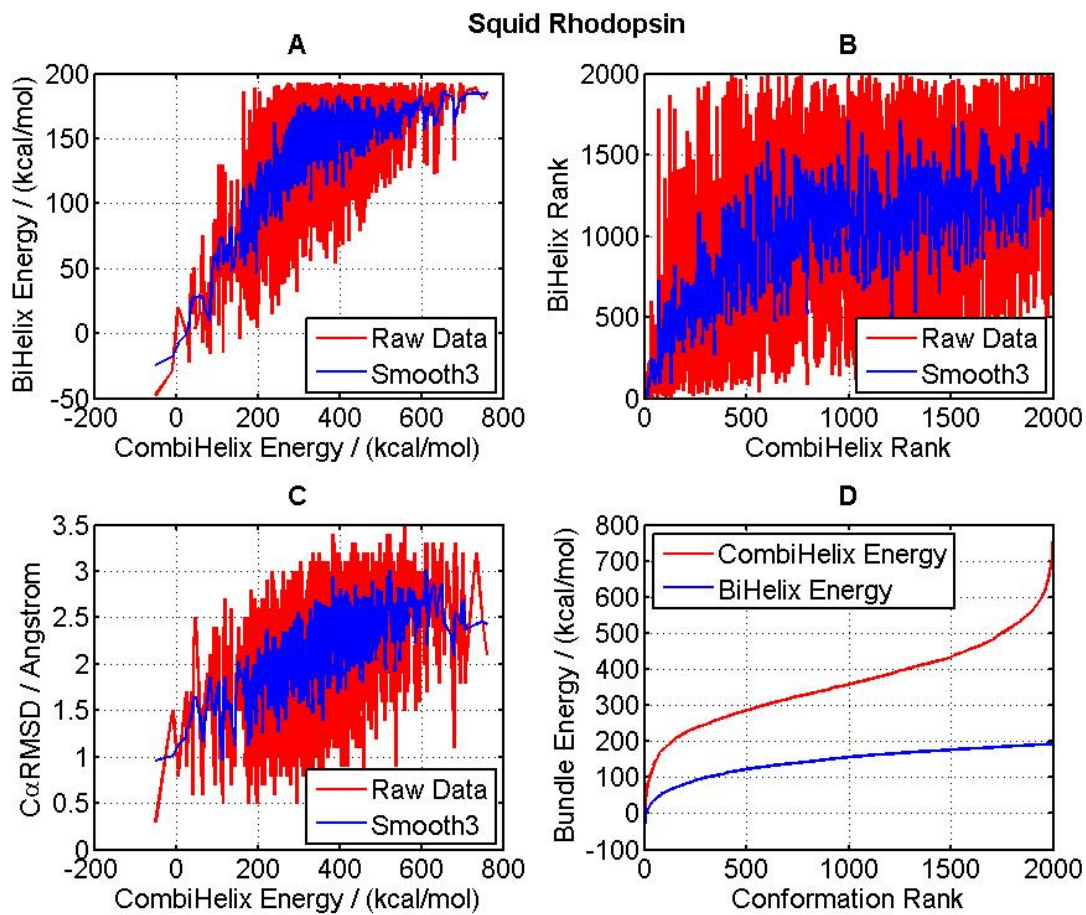

**Figure S8:** Same as **Figure S4** for squid Rhodopsin.

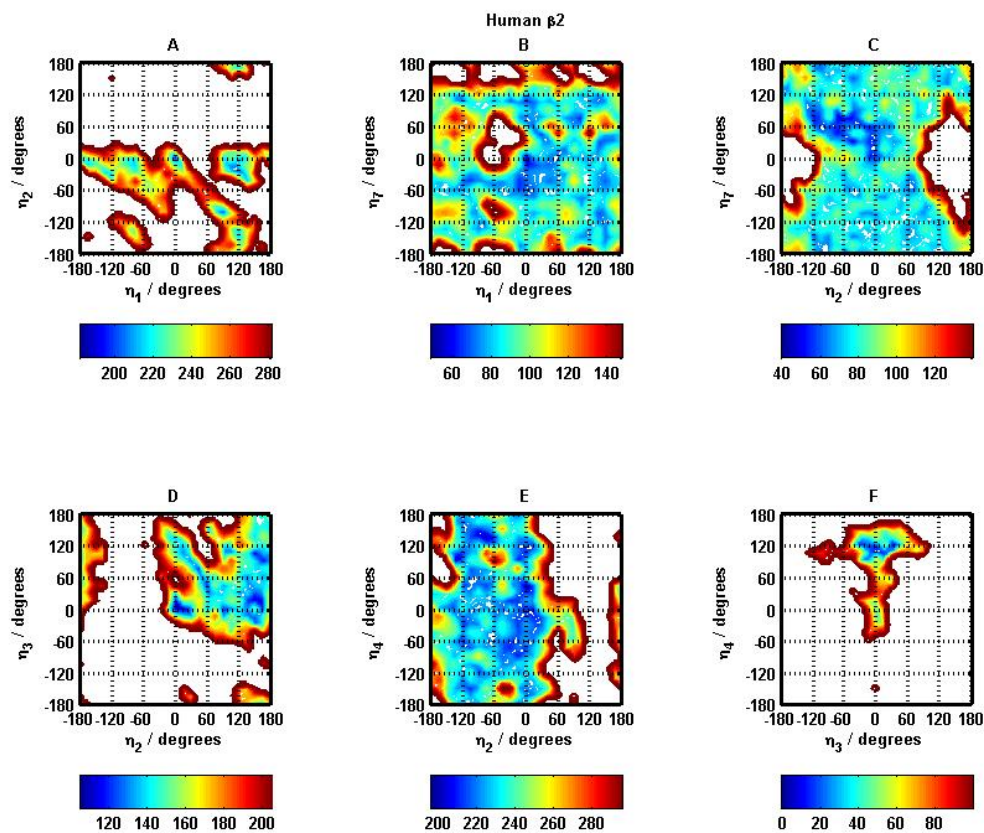

**Figure S9:** Beta2 adrenergic receptor potential energy surfaces for helix pairs TM1-TM2 (A), TM1-TM7 (B), TM2-TM7 (C), TM2-TM3 (D), TM2-TM4 (E), and TM3-TM4 (F) as a function of helix rotation angles for corresponding helices. The energies are in kcal/mol, where the colorbar under each panel shows the lowest 100 kcal/mol energy range.



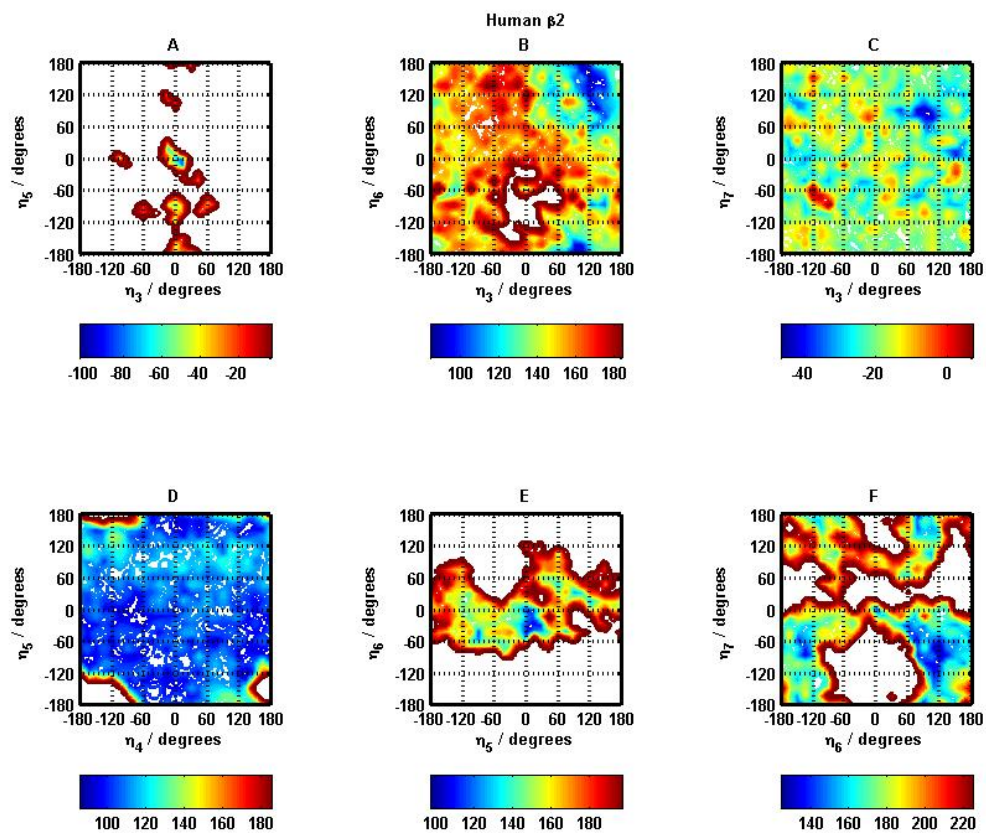

**Figure S10:** Same as Figure S6 for helix pairs TM3-TM5 (A), TM3-TM6 (B), TM3-TM7 (C), TM4-TM5 (D), TM5-TM6 (E), and TM6-TM7 (F).

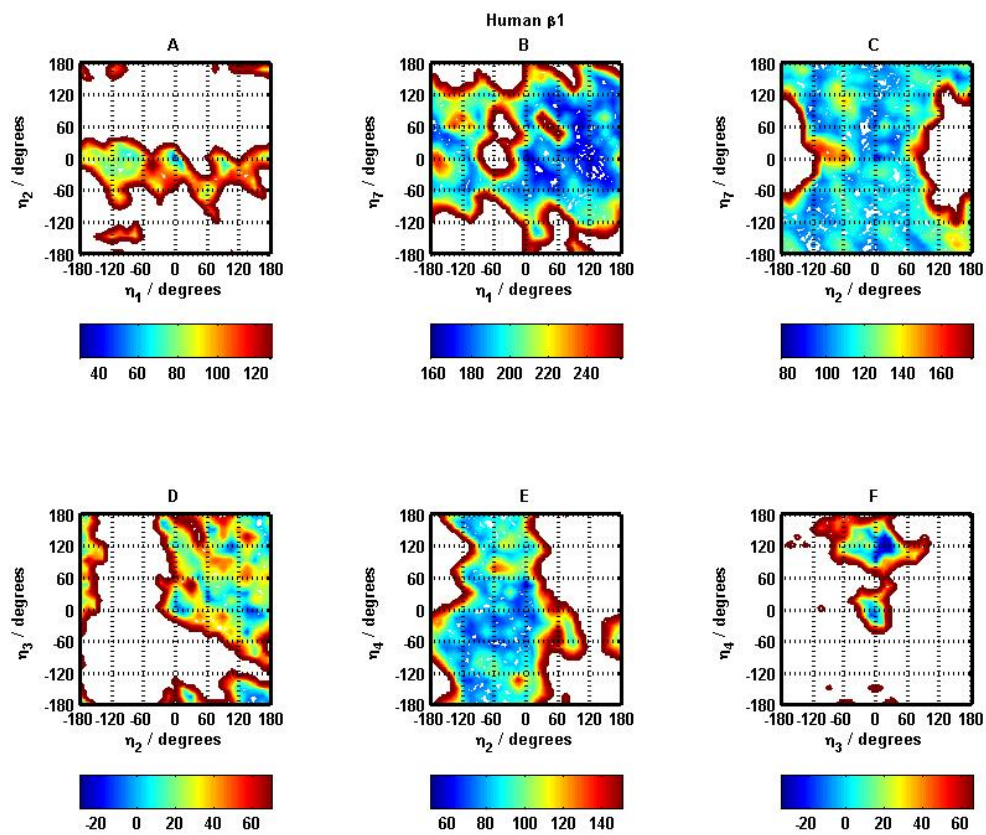

**Figure S11:** Same as **Figure S9** for Beta1 adrenergic receptor.

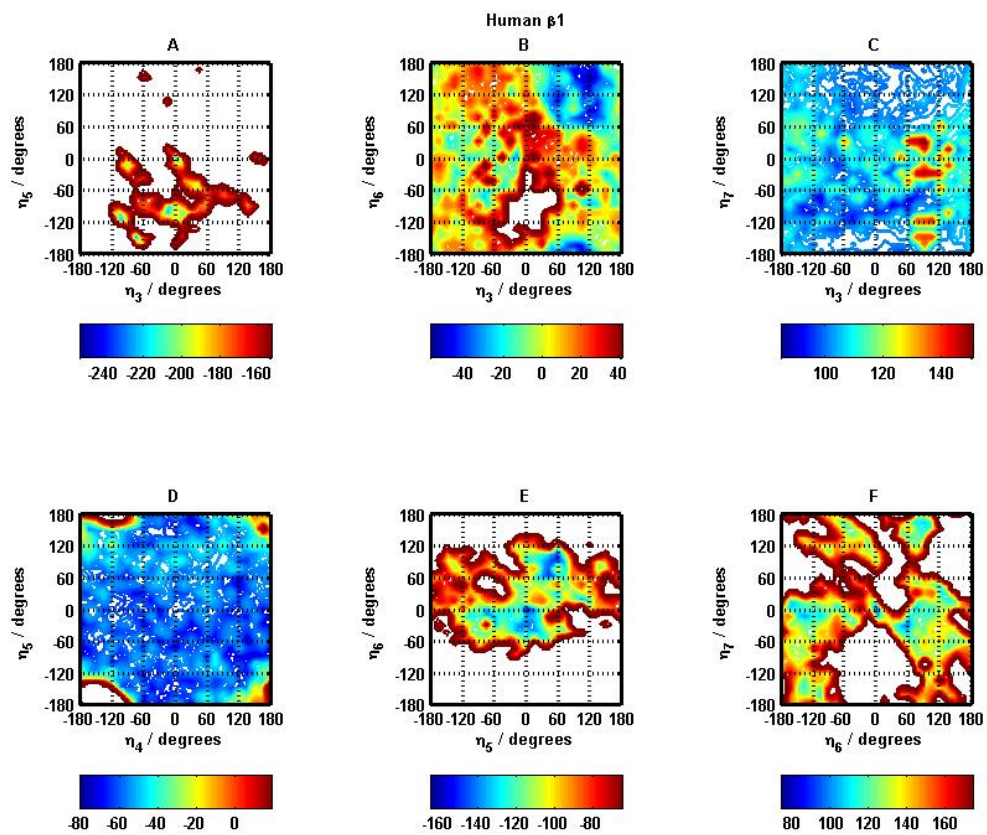

**Figure S12:** Same as **Figure S10** for Beta1 adrenergic receptor.

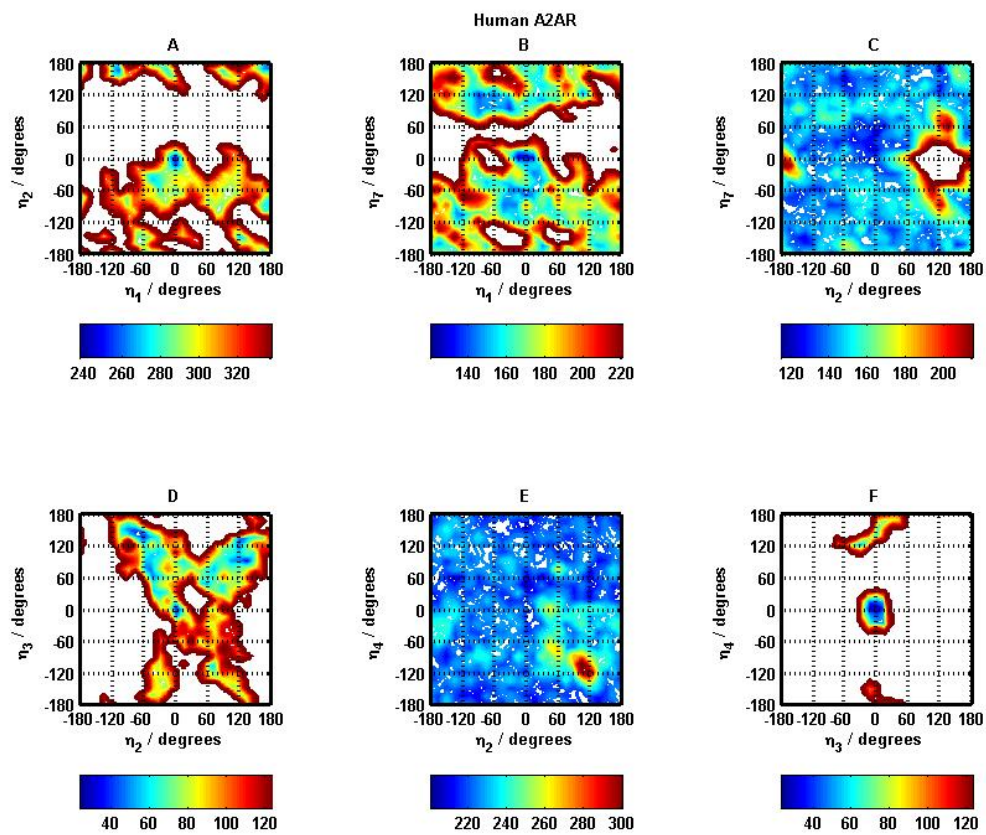

**Figure S13:** Same as **Figure S9** for adenosine A2A receptor.

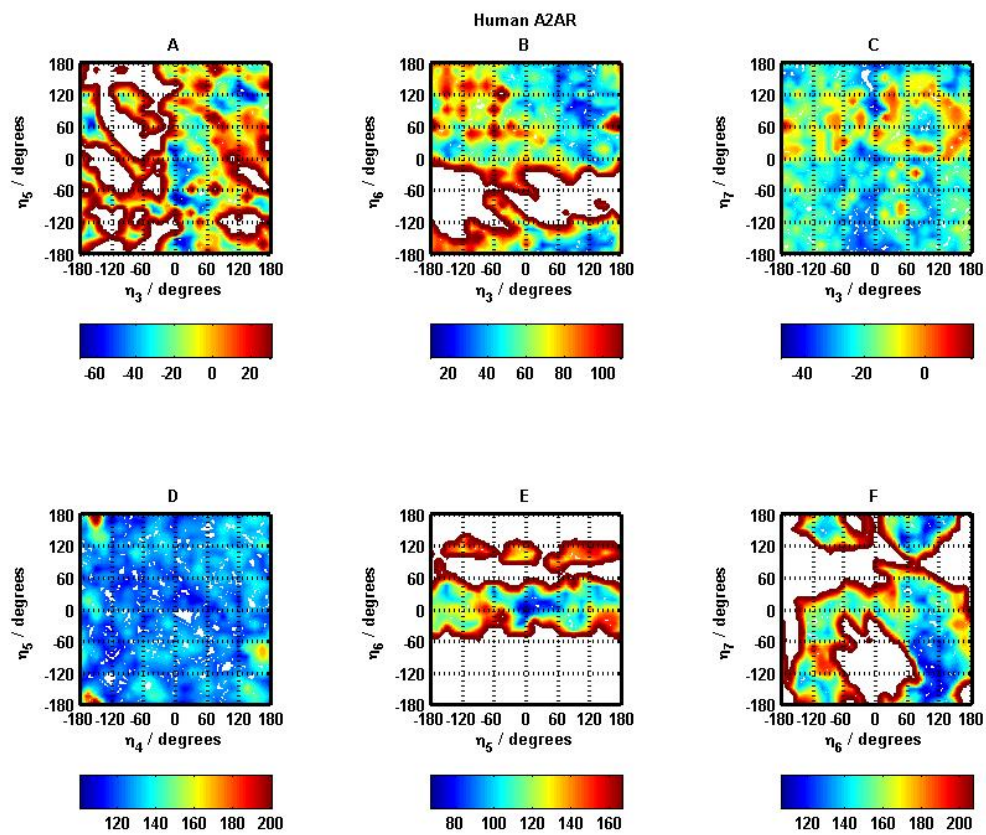

**Figure S14:** Same as **Figure S10** for adenosine A2A receptor.

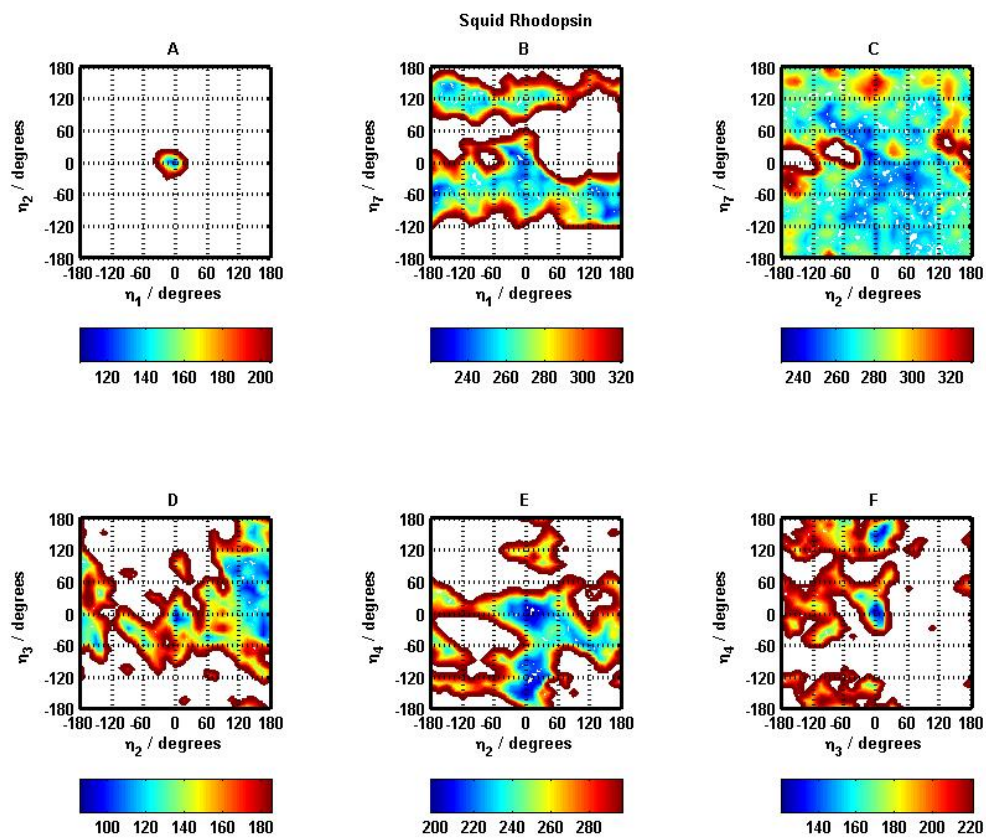

Figure S15: Same as Figure S9 for squid rhodopsin.

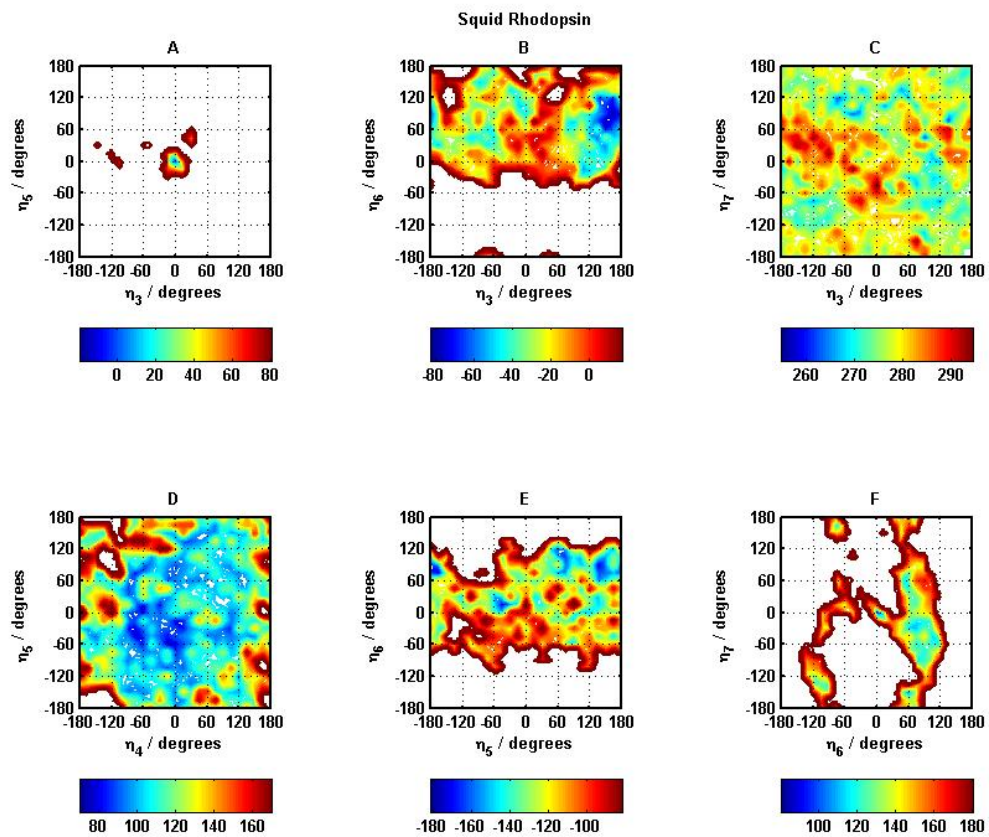

**Figure S16:** Same as **Figure S10** for squid rhodopsin.
